# Supplementary material for: UV–Vis Transparent Conductive Film Based on Cross-Linked Ag Nanowire Network: A Design for Photoelectrochemical Device
Source: MDPI journal article supplement (doi:10.3390/inorganics10100164), 2022-10-02
Supplement: s1 [file s1]

# UV-Vis transparent conductive film based on cross-linked Ag nanowire network: a design for photoelectrochemical device

Peiling Ren <sup>a</sup>, Youqing Wang <sup>a, \*</sup>, Menghan Liu <sup>a</sup>, Miaomiao Zhang <sup>a</sup>, Wenxuan Wu <sup>a</sup>, Hongjun Wang <sup>a</sup>, Daobin Luo <sup>a</sup>

<sup>a</sup> *Research Center for Semiconductor Materials and Devices, Shaanxi University of Science and Technology, Xi'an 710021, China*

\* *Corresponding author. E-mail address: [wangyouqing@sust.edu.cn](mailto:wangyouqing@sust.edu.cn)*

## Supplementary Data

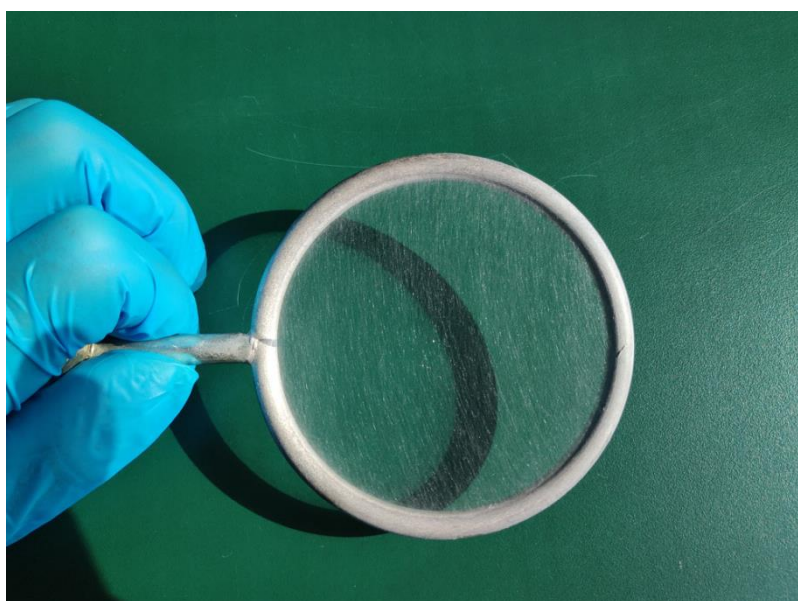

**Figure S1.** The Ag layer under side light illumination.

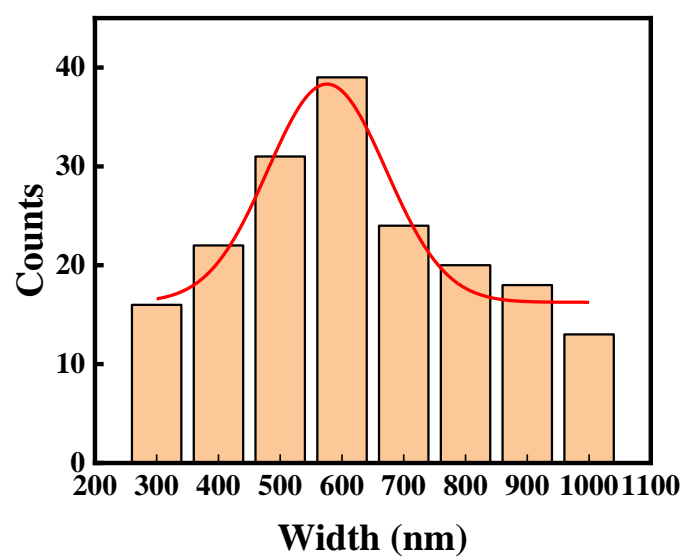

**Figure S2.** The counts under different width of AgNWs acquired by SEM image.

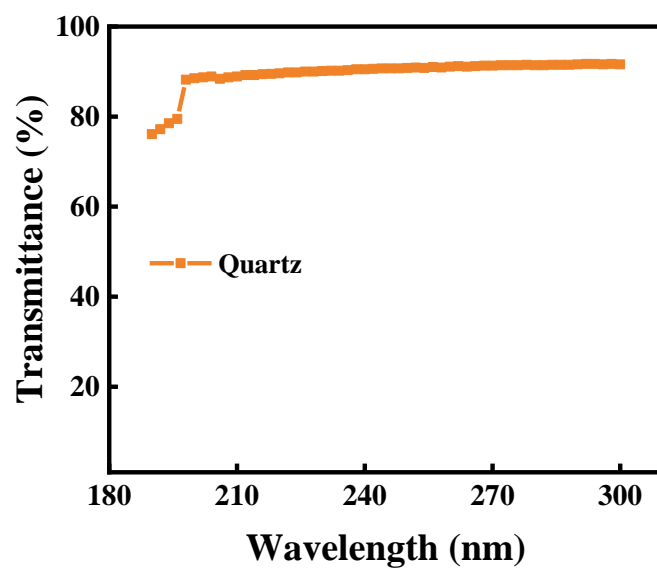

**Figure S3.** The transmittance of quartz from 190 to 300 nm.

**Table S1.** Thickness of TiO<sub>2</sub> layer, sheet resistance and transmittance versus different sputtering time.

| Sputtering time (min)                   | 1.5   | 3.0   | 4.5   | 6.0   | 7.5    | 9.0    | 10.5   | 12.0   |
|-----------------------------------------|-------|-------|-------|-------|--------|--------|--------|--------|
| Thickness of TiO <sub>2</sub> (nm)      | 27.75 | 55.5  | 83.25 | 111   | 138.75 | 166.5  | 194.5  | 222    |
| Sheet resistance ( $\Omega/\text{sq}$ ) | 3.662 | 5.373 | 6.903 | 9.478 | 11.775 | 15.493 | 21.083 | 27.309 |
| Transmittance (%)                       | 46    | 41.5  | 37.3  | 33.6  | 26.7   | 21.2   | 13.6   | 6.9    |

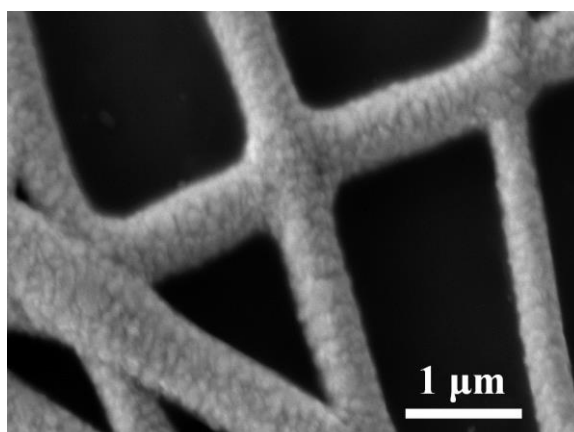

**Figure S4.** The cross-linked intersection of different AgNWs.

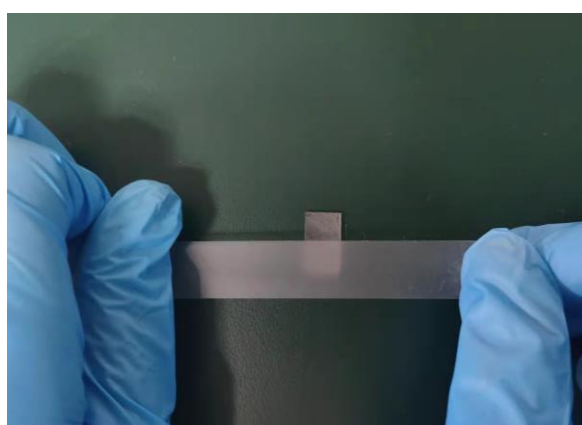

**Figure S5.** Diagram of 3M-Scotch tape testing.
